# Supplementary material for: The low-cost multi-channel biosensor for the quick detection of different food pathogens
Source: Research Square preprint supplement (doi:10.21203/rs.3.rs-6496632/v1), 2025-04-28

**Table S1. The effect of Water/LB permeability test on multi-substrates layer composition.**

| **Multi-substrates composition** | **Various thicknesses of multi-substrates layer film** | | | | | | | | | | |
| --- | --- | --- | --- | --- | --- | --- | --- | --- | --- | --- | --- |
| **0.8 mm** | | | **1.0 mm** | | | | **1.2 mm** | | | |
| **Different time intervals** | | | | | | | | | | |
| **8 h** | **6h** | **24h** | | **8h** | **16h** | **24h** | | **8h** | **16h** | **24h** |
| Alginate 2.5% + Gelatin 2.5% | **-** | **-** | **-** | | **-** | **-** | **-** | | **-** | **-** | **-** |
| Cornstarch 4% + Gelatin 2.5% | **-** | **-** | **-** | | **-** | **-** | **-** | | **-** | **-** | **-** |
| Starch 3% + Gelatin 3% | **-** | **-** | **-** | | **-** | **-** | **-** | | **-** | **-** | **-** |
| Lactose 6% + Gelatin 3% | **-** | **-** | **-** | | **-** | **-** | **-** | | **-** | **-** | **-** |
| Glycine 6% + Gelatin 3% | **-** | **-** | **-** | | **-** | **-** | **-** | | **-** | **-** | **-** |

**(+) Passed, (-) Not Passed**

**Fig S1. Different bacterial strains sensitivity to multi-substrates based biosensor system with various concentrations (A)-*B. subtilis*, (B)-*S. marcescens* (C)*-S.aureus,* (D)-*B. licheniformis* and (E)- *S.aureus* (****p<0.0001, ***p<0.0005, ** p=0.008, *p<0.05, and n.s.- not significant by ANOVA).**


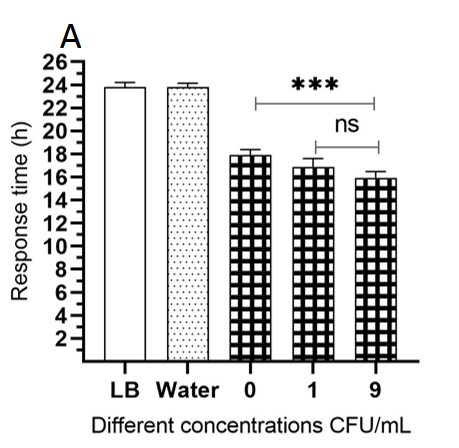

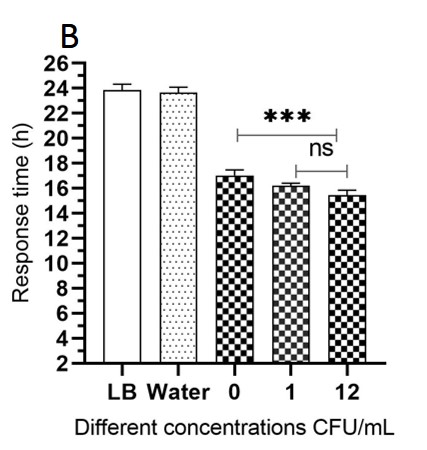

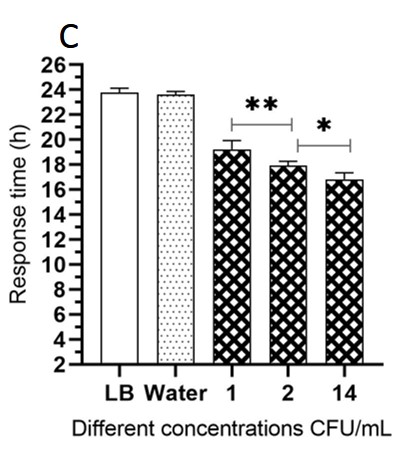


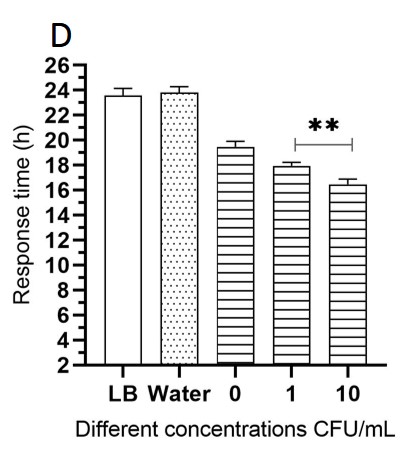

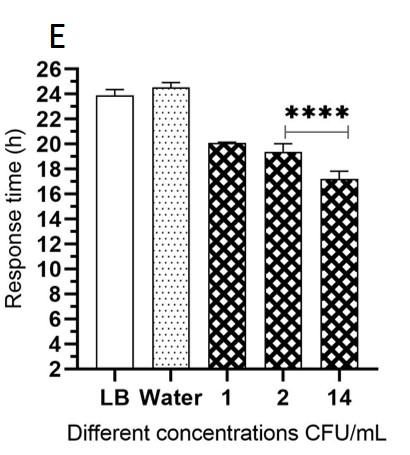


**Fig. S2**. Specificity of different bacterial strains detection on Multi-substrates layer system (A) *B.subtilis* detection on Alginate 2.5%+Gelatin2.5%, B) *S.marcescens* detection on Cornstarch 4%+Gelatin 2.5%, (C) *S. aureus* detection on Starch 3%+Gelatin 3%, (D) *B.licheniformis* detection on Lactose 6%+Gelatin 3% and (E) *S. aureus* detection on Glycine 6%+Gelatin 3%


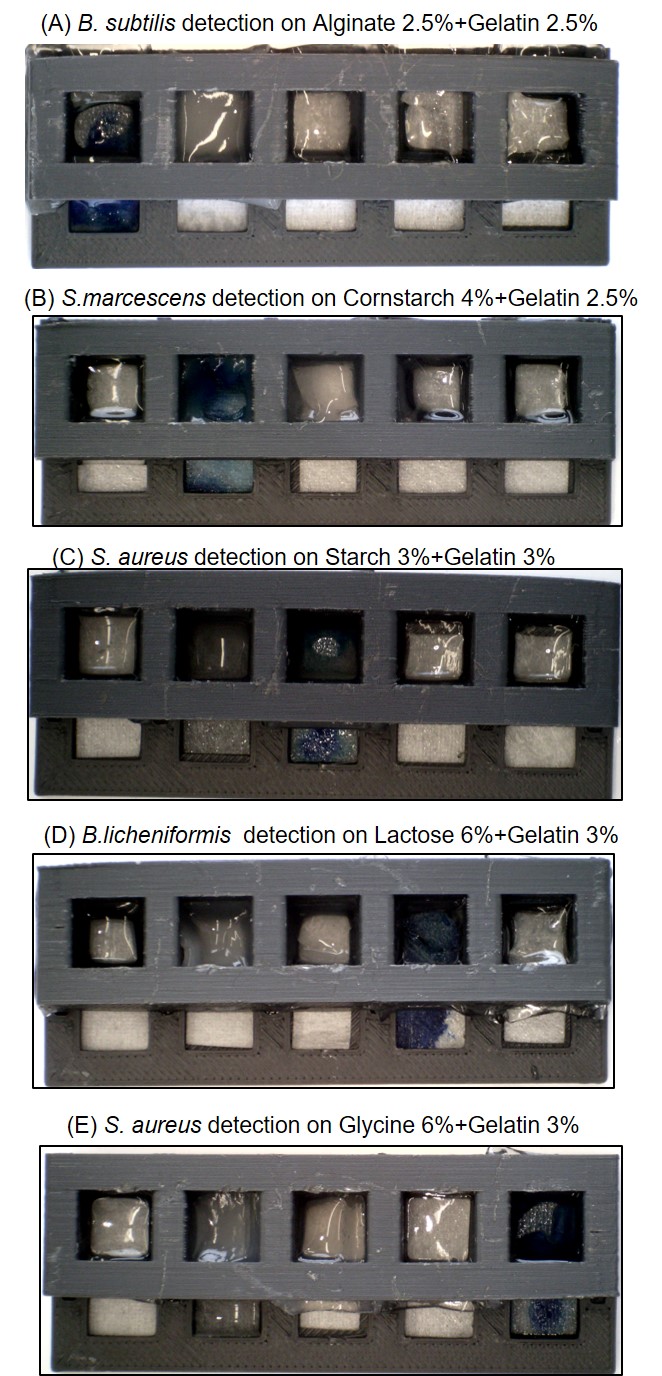

Supplement: Supplementary file 1 [file 066eef863d4d0bb3ac7233d0.docx]
